# Supplementary material
Source: PubMed Central journal article supplement (PMC9433443)

**Figure 1G**

22Rv1

IB: c-Myc

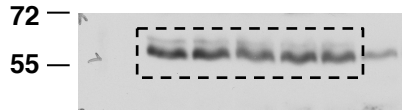

IB: USP22

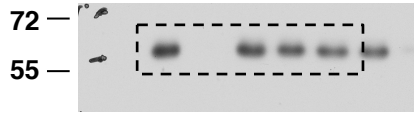

IB: USP28

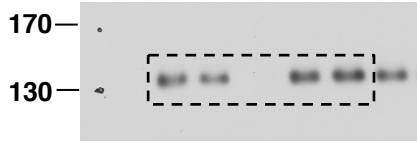

IB: USP36

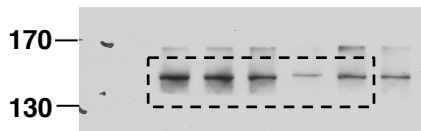

IB: Vinculin

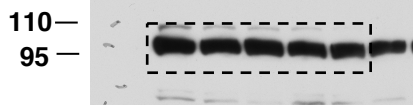

**Figure 1H**

C4-2

IB: c-Myc

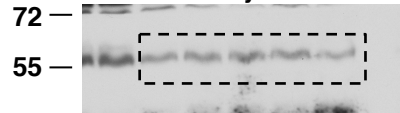

IB: USP22

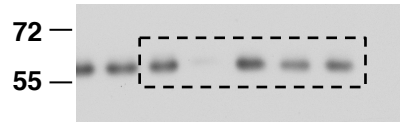

IB: USP28

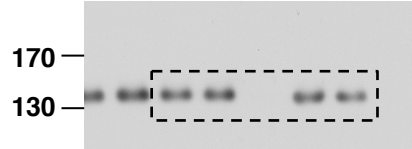

IB: USP36

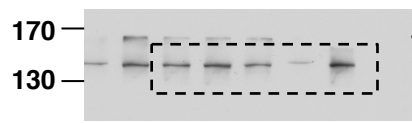

IB: Vinculin

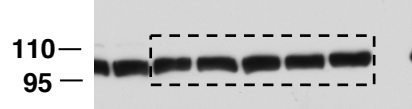

**Figure 2B**

IP-Flag, IB: HA

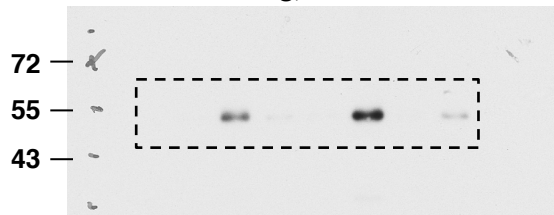

IP-Flag, IB: Flag

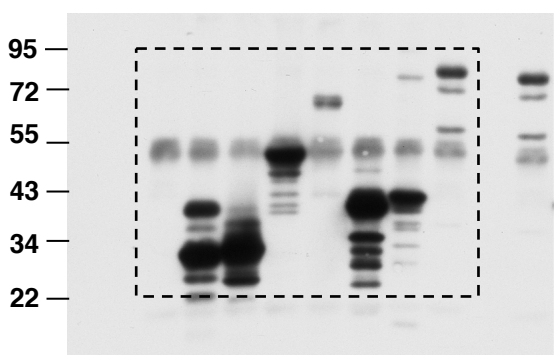

WCL, IB: HA

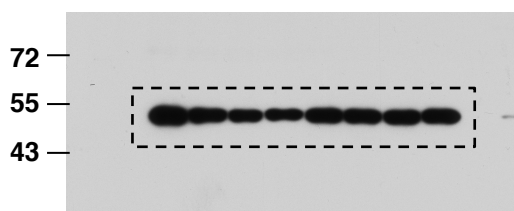

WCL, IB: Flag

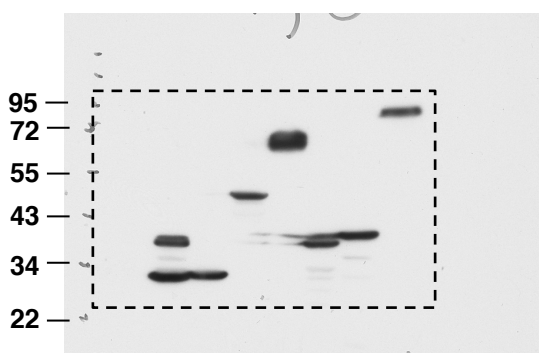

**Figure 2C**

IB: OTUD6A

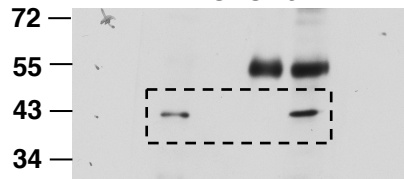

IB: c-Myc

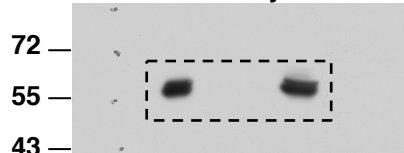

**Figure 2D**

IB: HA Ub(n)

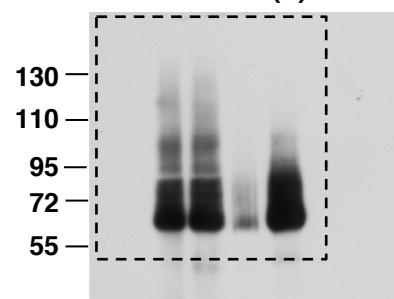

WCL, IB: HA

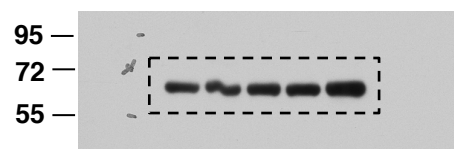

WCL, IB: Flag

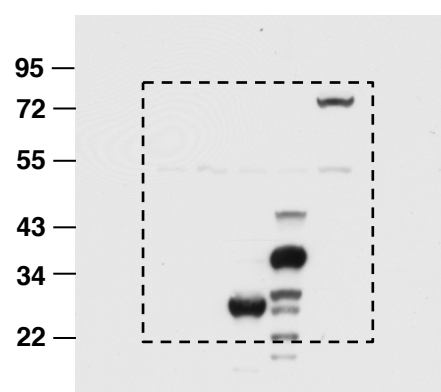

**Figure 2E**

IB: HA Ub(n)

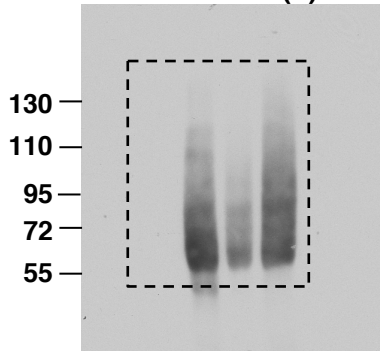

WCL, IB: HA

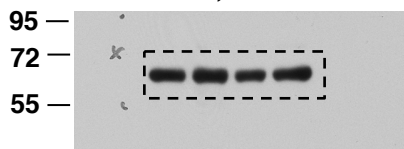

WCL, IB: Flag

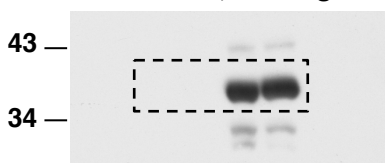

**Figure 2F**

IB: c-Myc

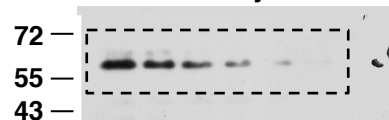

IB: Vinculin

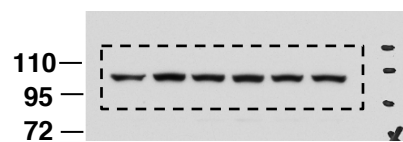

IB: c-Myc

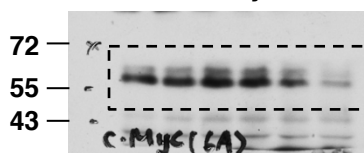

IB: Vinculin

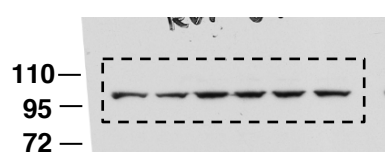

IB: c-Myc

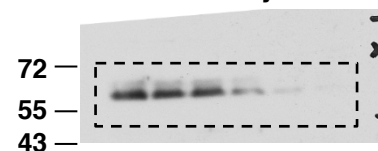

IB: Vinculin

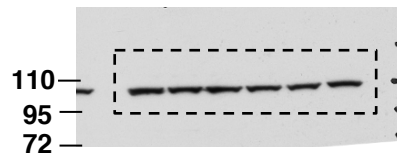

**Figure 4A**

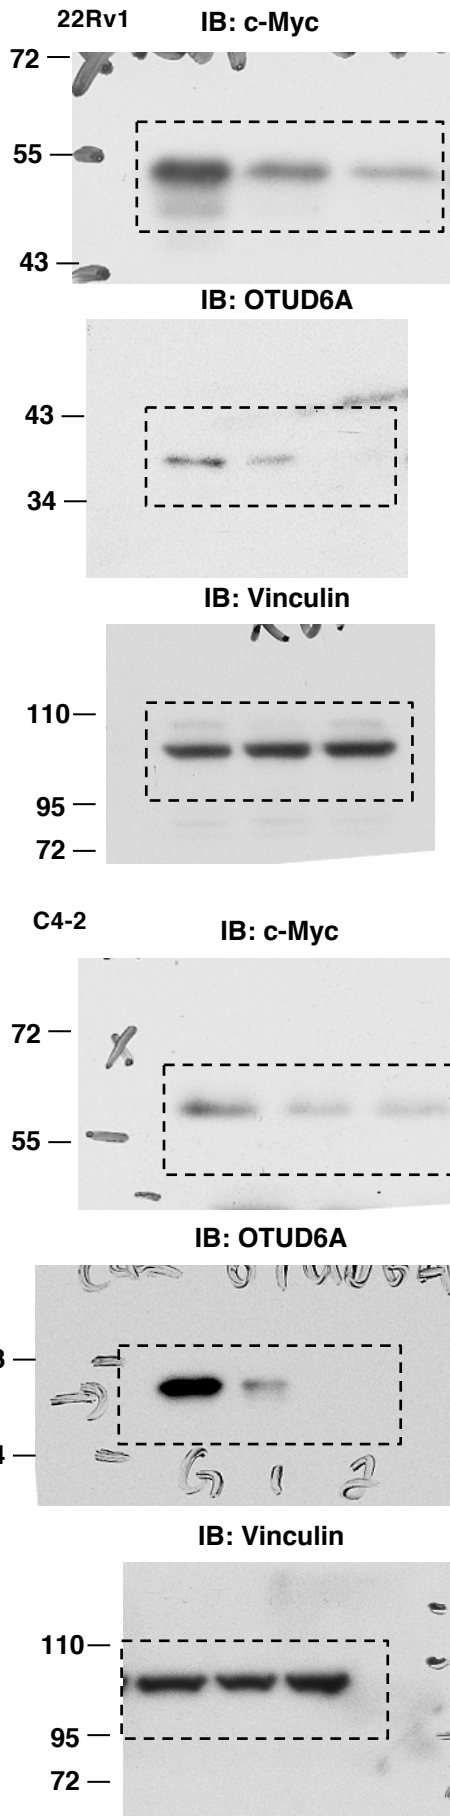

**Figure 4B**

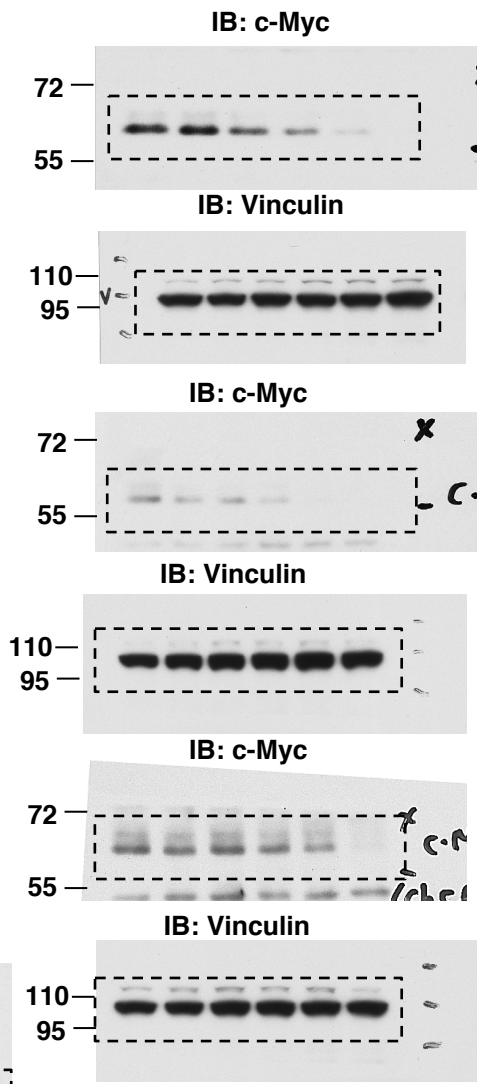

**Figure 4H**

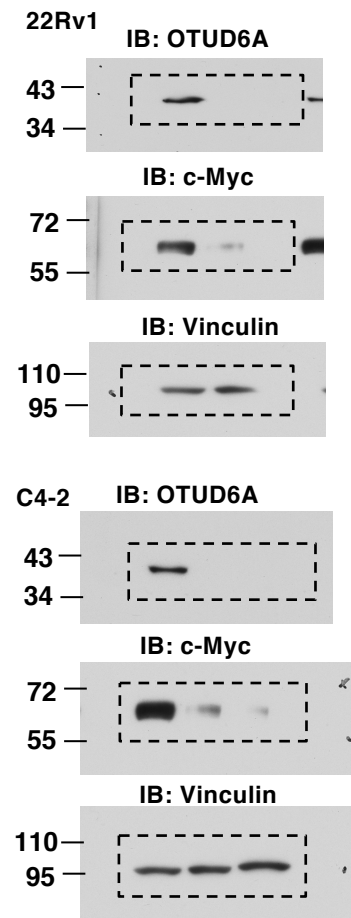

**Figure 3**

**Figure 5B**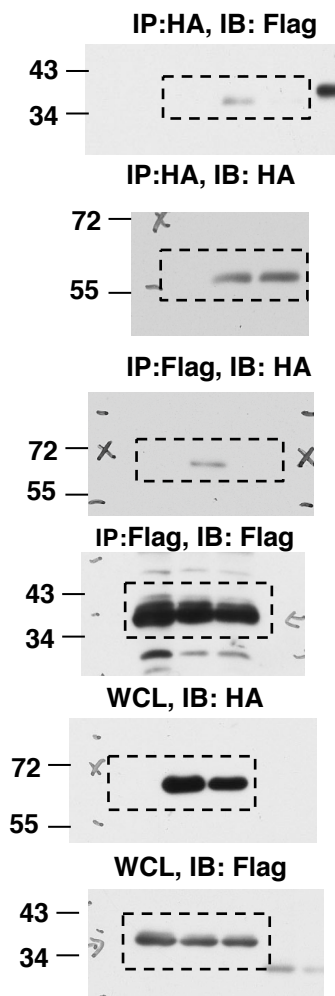**Figure 5C**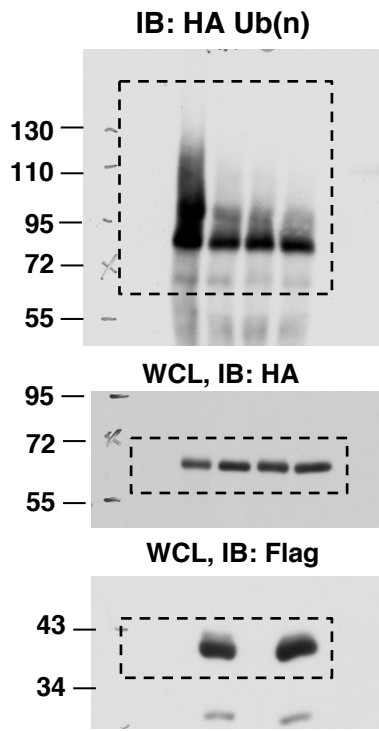**Figure 5D**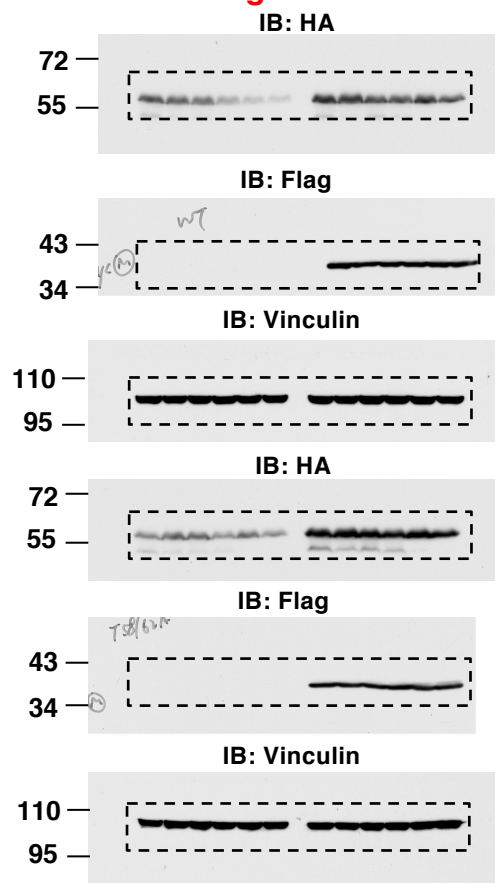**Figure 5F**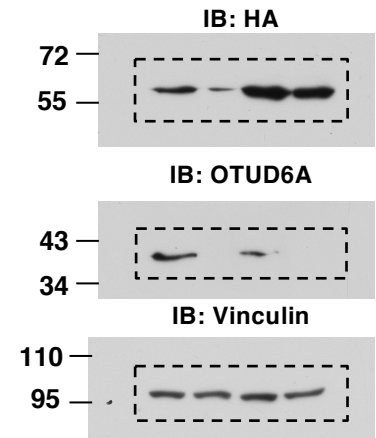

**Figure S2C**

DU145

IB: c-Myc

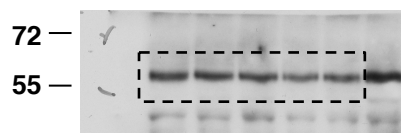

IB: USP22

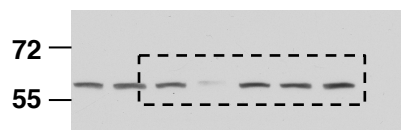

IB: USP28

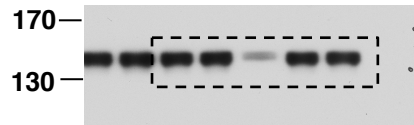

IB: USP36

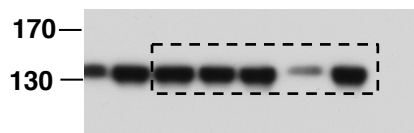

IB: Vinculin

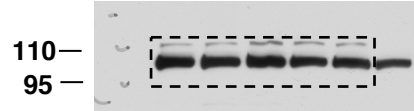

**Figure S2D**

PC3

IB: c-Myc

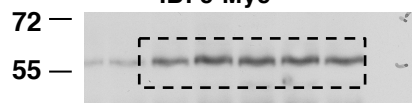

IB: USP22

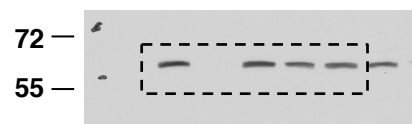

IB: USP28

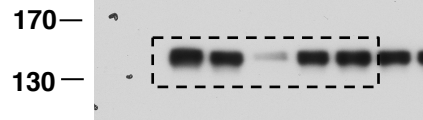

IB: USP36

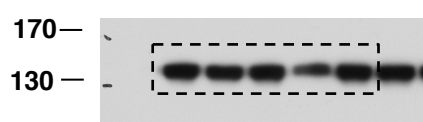

IB: Vinculin

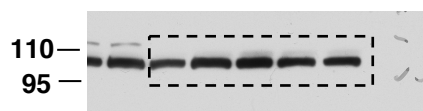

**Figure S2F**

MCF7

IB: c-Myc

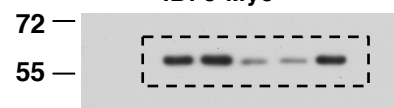

IB: Vinculin

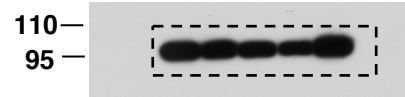

H1299

IB: c-Myc

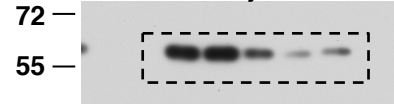

IB: Vinculin

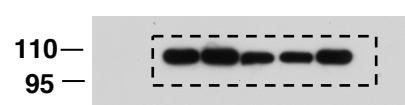

HeLa

IB: c-Myc

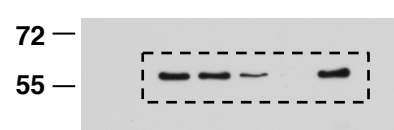

IB: Vinculin

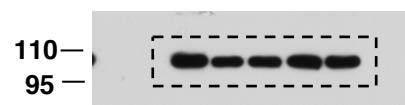

**Figure S4B**

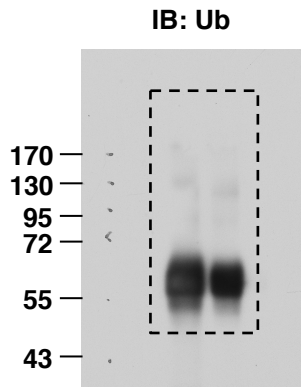

**Figure S4C**

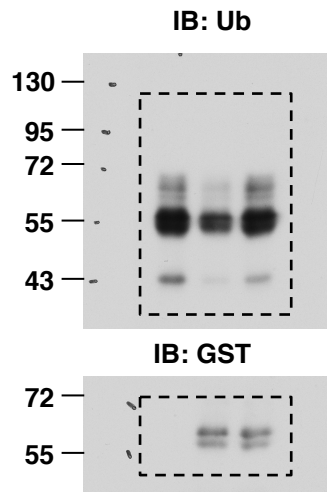

**Figure S4D**

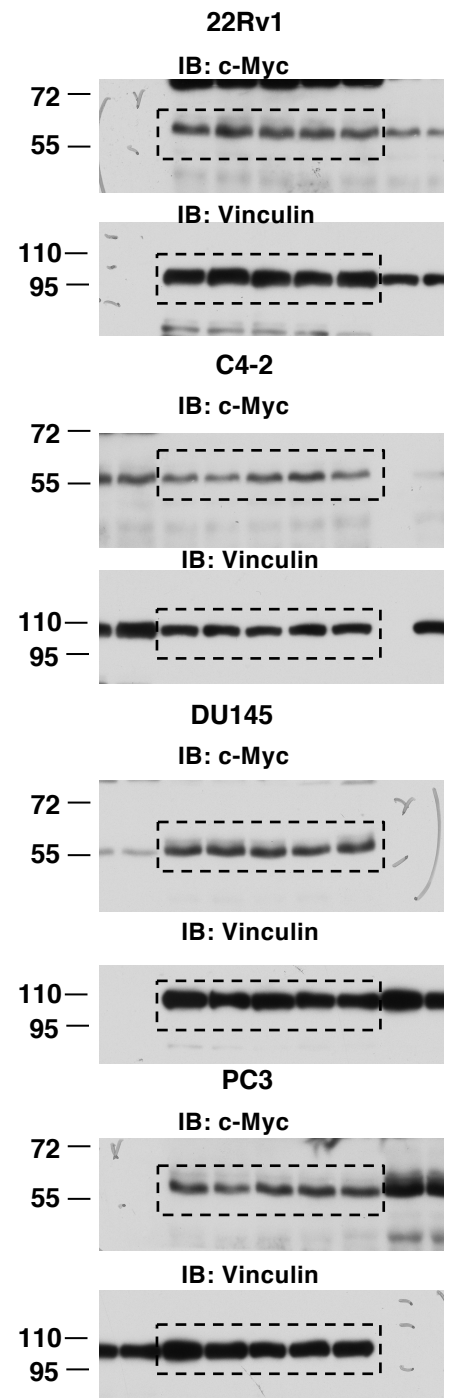

**Figure S4G**

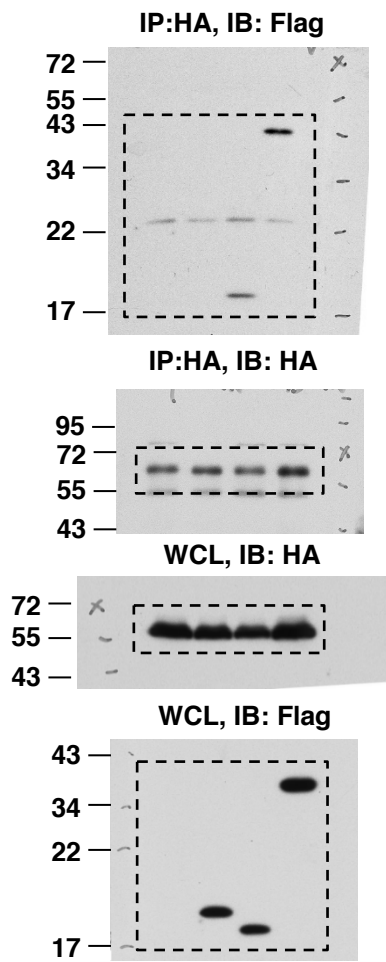

**Figure S4H**

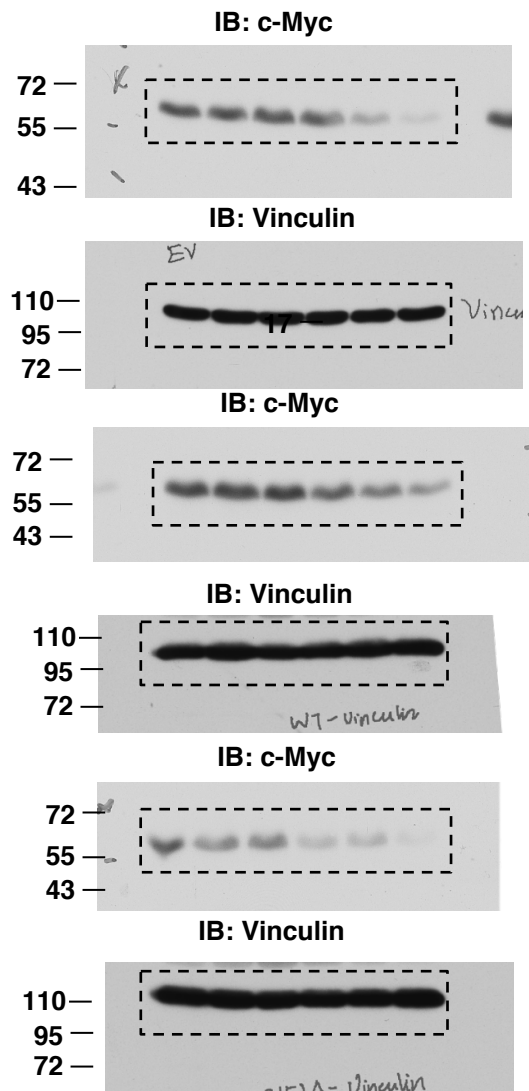

**Figure S6A**

IB: c-Myc

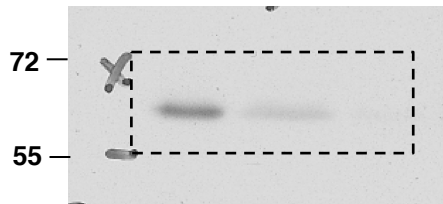

IB: OTUD6A

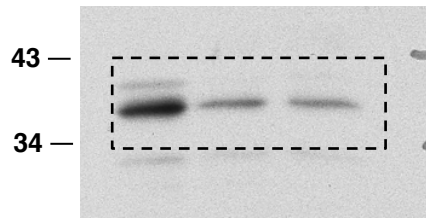

IB: Vinculin

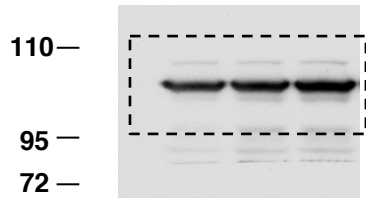

**Figure S6B**

IB: c-Myc

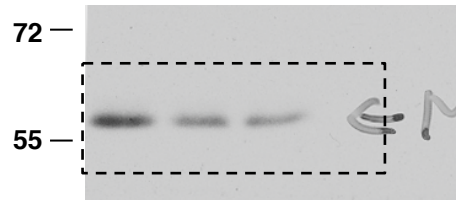

IB: OTUD6A

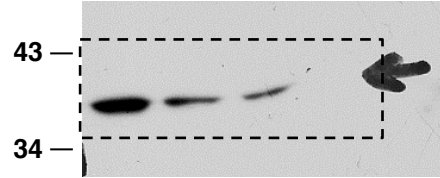

IB: Vinculin

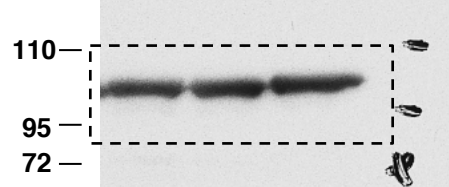

**Figure S6C**

IB: c-Myc

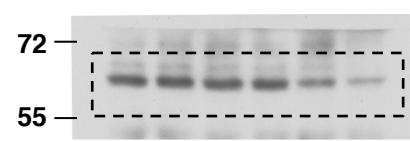

IB: Vinculin

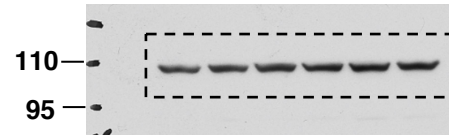

IB: c-Myc

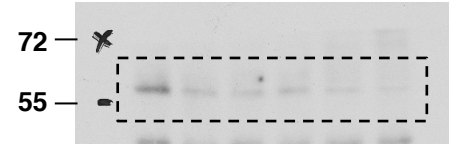

IB: Vinculin

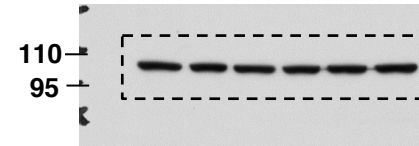

IB: c-Myc

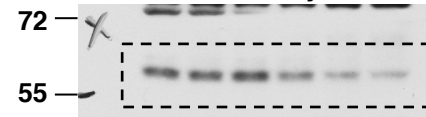

IB: Vinculin

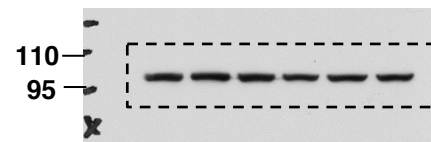

**Figure S6I**

IB: c-Myc

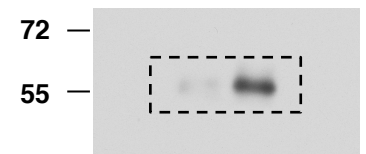

IB: HA-OTUD6A

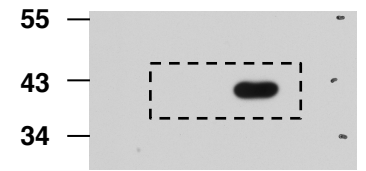

IB: GFP

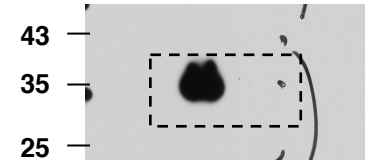

Supplement: 41418_2022_960_MOESM8_ESM.pdf [file 41418_2022_960_MOESM8_ESM.pdf]
