# Supplementary material
Source: PubMed Central journal article supplement (PMC9433443)
Supplement: 41418_2022_960_MOESM1_ESM.pdf [file 41418_2022_960_MOESM1_ESM.pdf]

1 **Supplementary materials**

2

3 **Prostate-specific Oncogene OTUD6A Promotes Prostatic Tumorigenesis via**  
4 **Deubiquitinating and Stabilizing c-Myc**

5

6 Yunhua Peng<sup>1,#</sup>, Jing Liu<sup>2,#</sup>, Zhen Wang<sup>1,#</sup>, Chunping Cui<sup>3,#</sup>, Tiantian Zhang<sup>1</sup>, Shuangxi  
7 Zhang<sup>1</sup>, Peipei Gao<sup>1</sup>, Zhanwu Hou<sup>1</sup>, Huadong Liu<sup>1</sup>, Jianping Guo<sup>4</sup>, Jinfang Zhang<sup>5</sup>,  
8 Yurong Wen<sup>6</sup>, Wenyi Wei<sup>2</sup>, Lingqiang Zhang<sup>3,\*</sup>, Jiankang Liu<sup>1,7,\*</sup>, Jiangan Long<sup>1,\*</sup>

9

10 # These authors contribute equally.

11 \*To whom correspondence should be addressed:

12 Dr. Jiangan Long, jglong@ mail.xjtu.edu.cn

13 Dr. Jiankang Liu, j.liu@mail.xjtu.edu.cn

14 Dr. Lingqiang Zhang, zhanglq@nic.bmi.ac.cn.

15

16

17 **Supplementary Figures. 1-9**

18

19

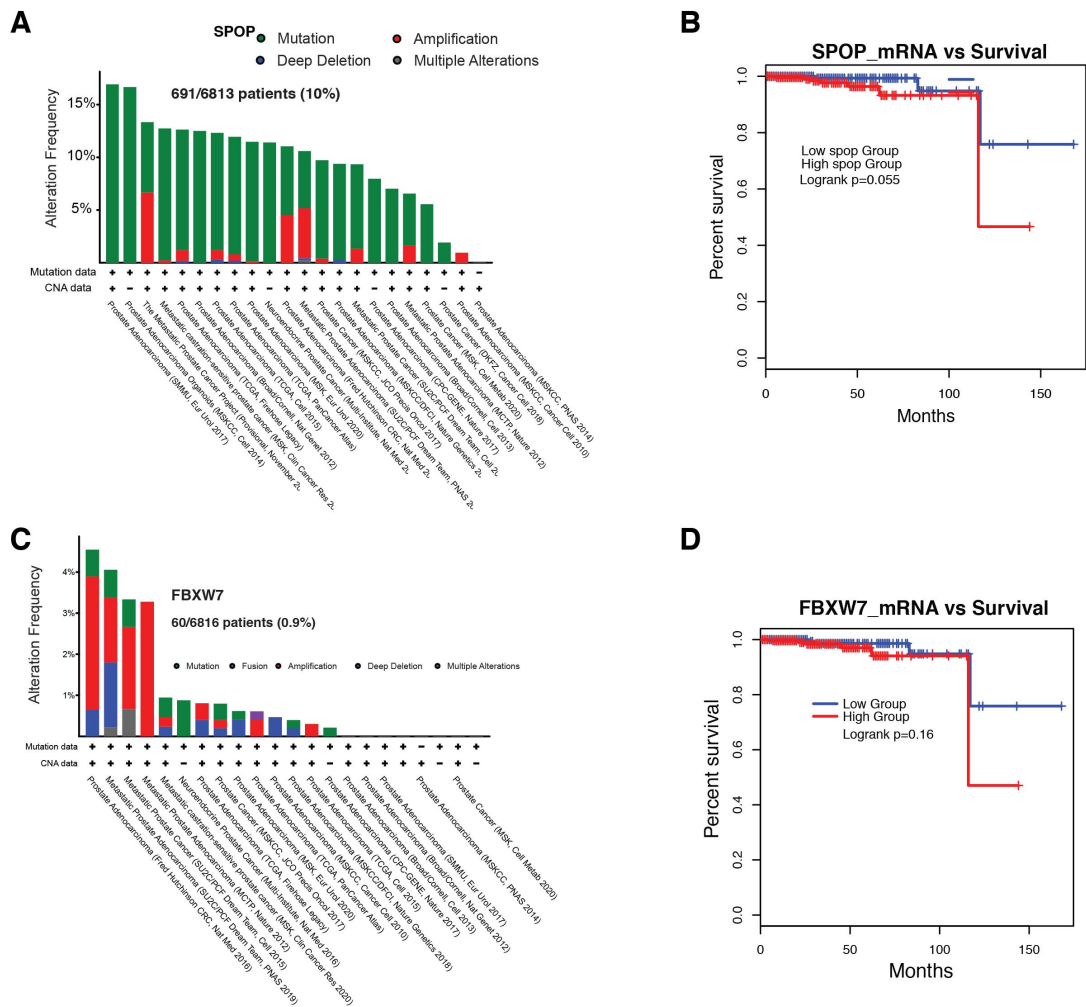

20

21 **Supplementary figure 1. c-Myc protein overexpression in prostate cancer (PrCa)**  
 22 **patients might be due to both the transcriptional and post-translational regulation.**

23 **(A)** SPOP, a ubiquitin E3 ligase of c-Myc in PrCa setting is highly mutated in PrCa  
 24 patients. **(B)** SPOP expression is not a prognostic marker for PrCa patients. **(C)** The  
 25 tumor suppressive FBXW7, another ubiquitin E3 ligase of c-Myc is not frequently  
 26 mutated in PrCa patients. **(D)** FBXW7 is not a prognostic marker for PrCa patients.

27

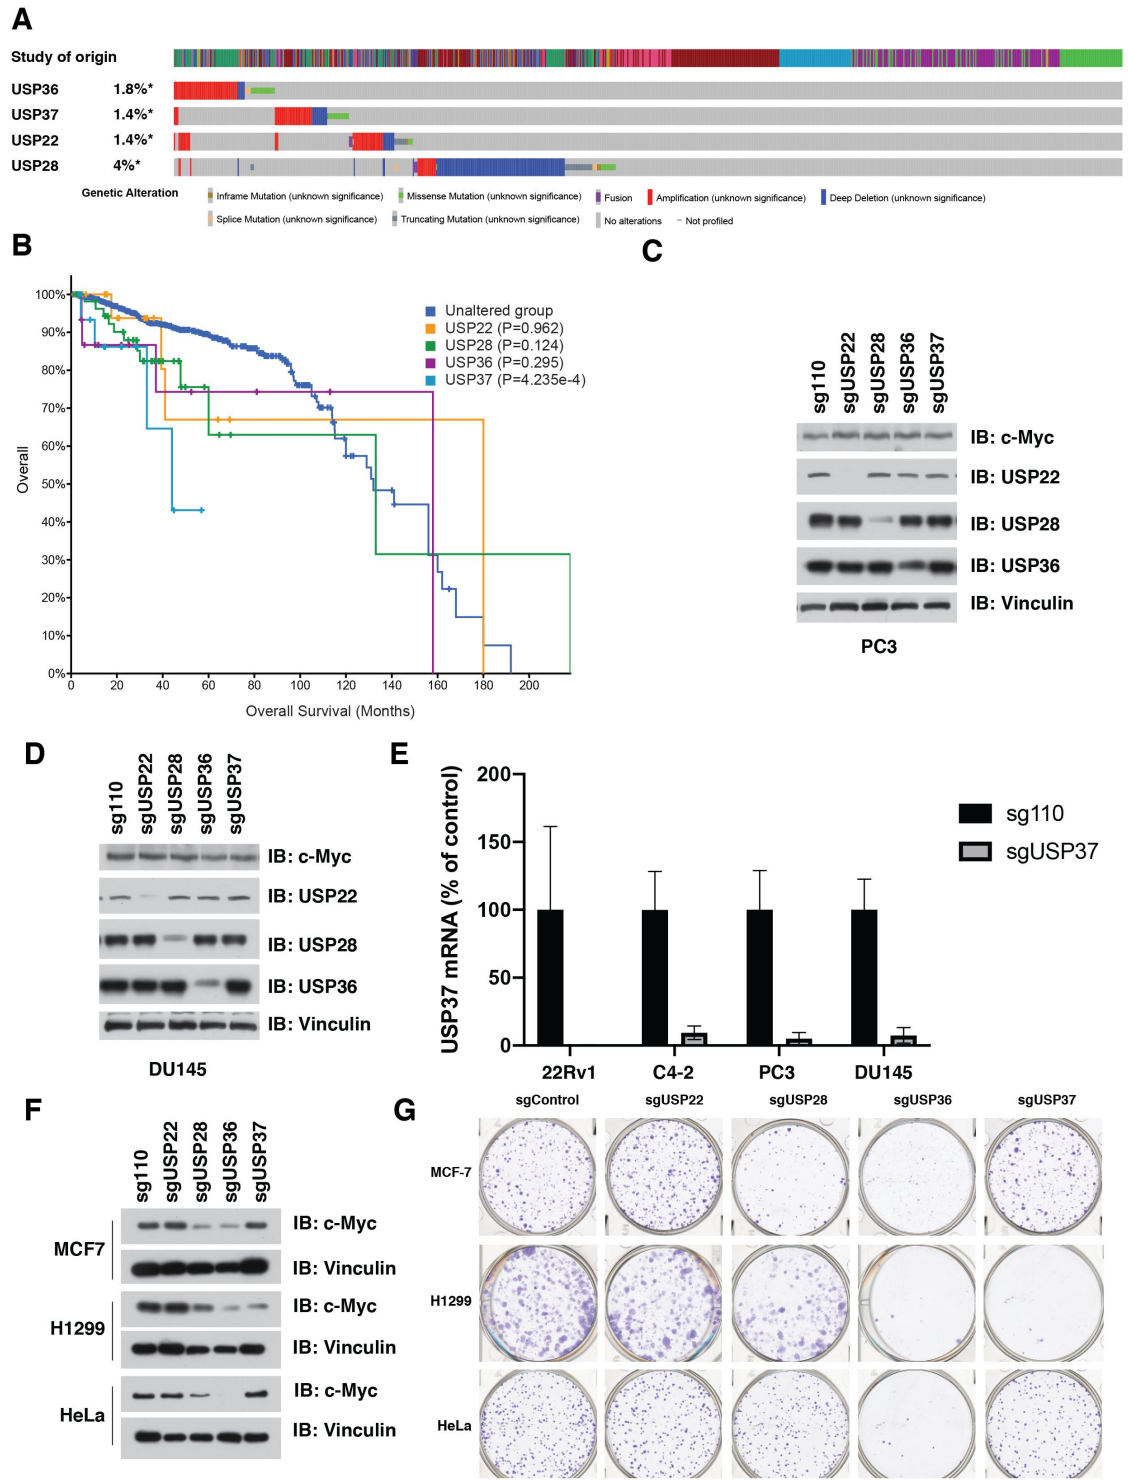

28

29 **Supplementary figure 2. The USPs are not physiological DUBs for c-Myc**

30 **oncoprotein in PrCa cells. (A) Genetic variations, including copy number alternation**

31 **(CNA) or point mutations, of of USP22, USP28, USP36 and USP37 in human PrCa**

32 patients in TCGA database. **(B)** Genetic variations of USP22, USP28 or USP37 did not  
33 predict worse prognosis of PrCa patients. **(C. D)** Depletion of USP22, USP28, USP36 or  
34 USP37 did not change the protein level of c-Myc in PC3 **(C)** and DU145 **(D)** PrCa cells.  
35 **(E)** The USP37 mRNA in PrCa cells after depletion of *USP37* using CRISPR/Cas9. **(F)**  
36 Depletion of USP DUBs led to reduce in c-Myc in MCF7 breast cancer cells, NCI-H1299  
37 lung cancer cells and HeLa cervical cancer cells. **(G)** Depletion of USP DUBs  
38 compromised the tumorigenesis ability of breast and lung cancer cell lines.  
39 The relevant raw data are provided in Supplemental Materials.

40

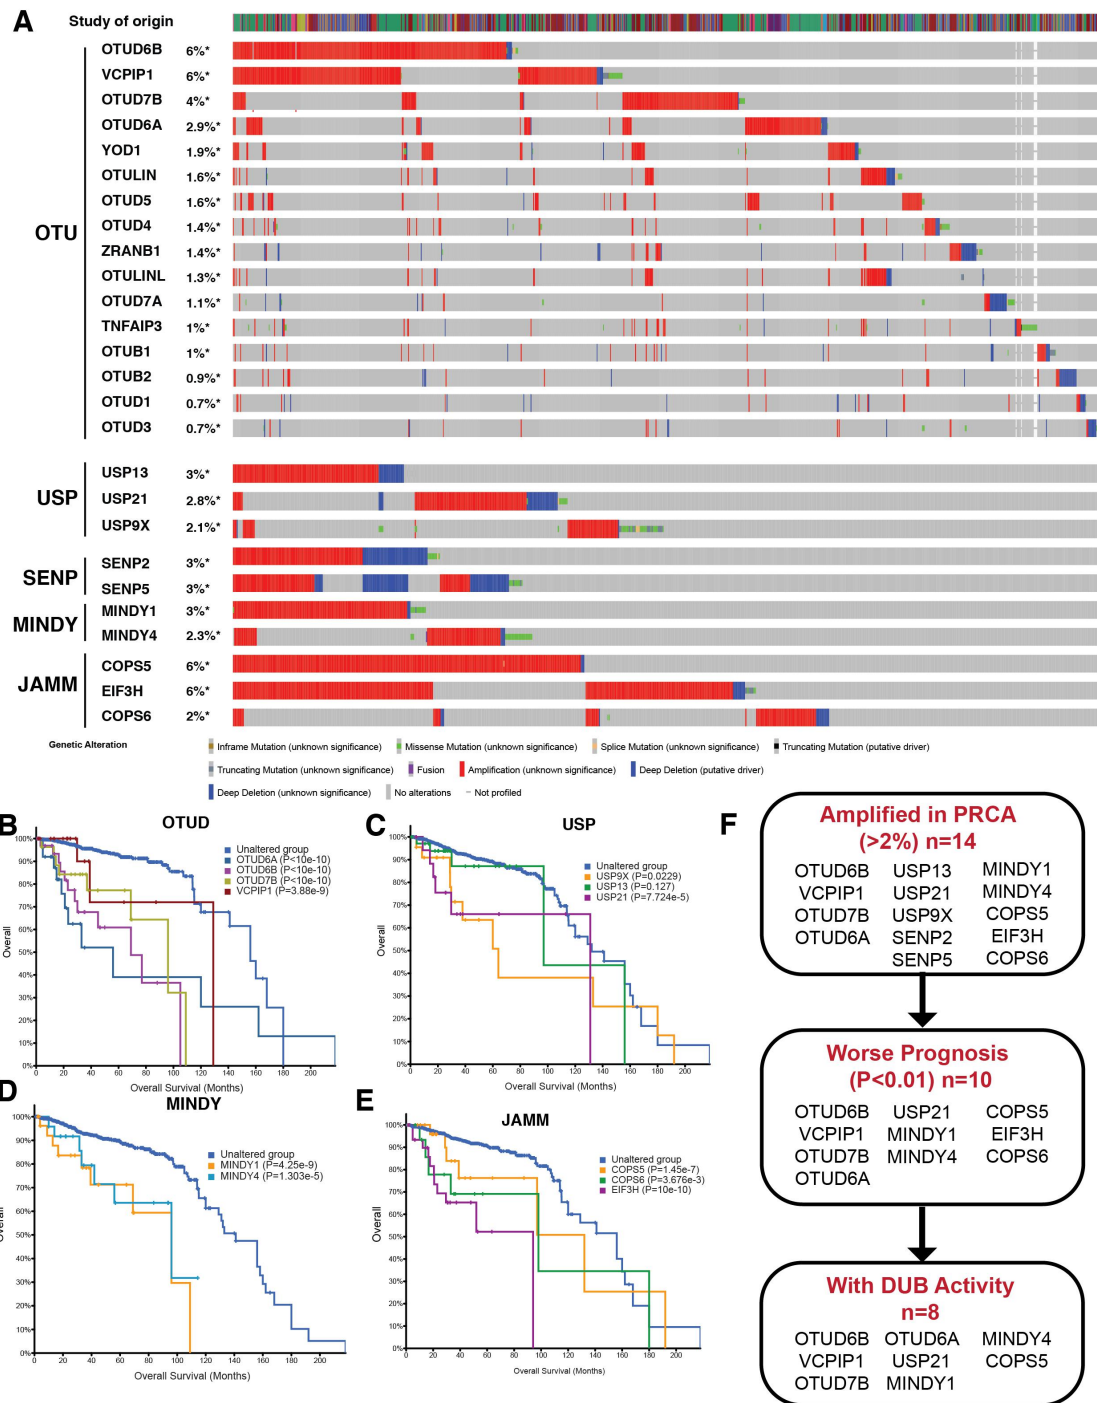

41

42 **Supplementary figure 3. Screening of physiological DUBs for c-Myc oncoprotein in**

43 **PrCa setting. (A) Genetic variations, including copy number alternation (CNA) or point**

44 **mutations, of DUBs in human PrCa. (B-E) The correlation between the genetic variations**

45 of OTU (**B**), USP (**C**), MINDY (**D**) and JAMM (**E**) DUBs and prognosis of PrCa patients.

46 (**F**) Screen pitfall of physiological DUBs for c-Myc oncoprotein in PrCa setting.

47

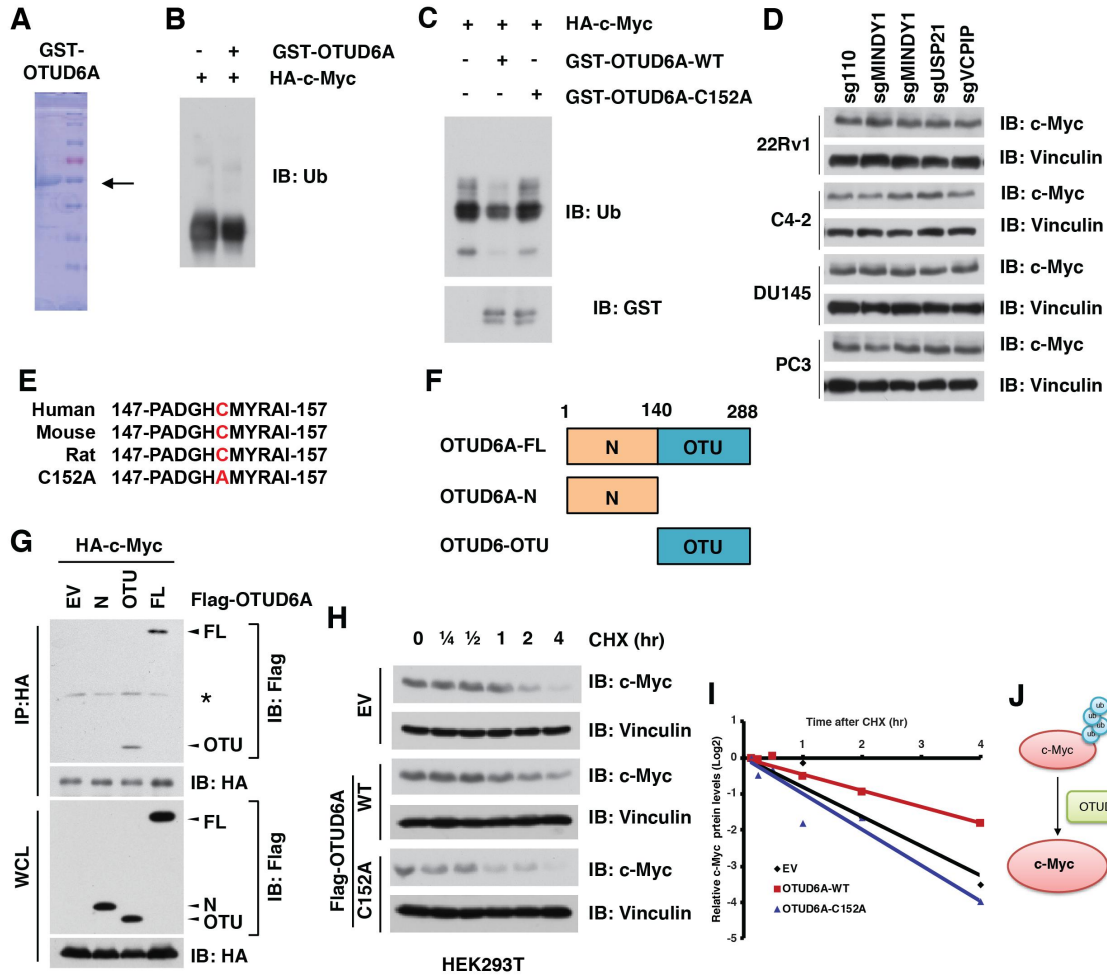

48

49 **Supplementary figure 4. OTUD6A regulates the protein stability of c-Myc in PrCa**

50 **setting.** (A) GST-OTUD6A protein was purified from BL21 *E. Coli*. (B) OTUD6A

51 deubiquitinated c-Myc *in vitro*. HA-c-Myc protein derived from HEK293T cells with

52 poly-ubiquitin chain was incubated with bacterial purified GST-OTUD6A protein, and

53 then was analyzed by SDS-PAGE. (C) OTUD6A deubiquitinated c-Myc in a catalytic

54 activity dependent manner *in vitro*. (D) Depletion of MINDY1/4, USP21 or VCPIP did

55 not affect the protein abundance of c-Myc oncoprotein. (E) Alignment of the conserved

56 cysteine residual in OTUD6A among species. (F) A schematic diagram to show the full

57 length (FL) or N-terminal (N) and OTU-domain (OTU) of OTUD6A. **(G)** c-Myc binds  
58 with the OTU domain of OTUD6A. **(H, I)** Ectopic WT, but not the C152A mutant of  
59 OTUDA6 extends the protein half-life of c-Myc in 22Rv1 cells. Immunoblot **(H)** and  
60 quantification **(I)** of cell lysis derived from 22Rv1 cells transient transfected with either  
61 EV, OTUD6A-WT or OTUD6A-C152A, and treated with 200 µg/ml of CHX for  
62 indicated time. **(J)** A schematic diagram shows the deubiquitination of c-Myc by  
63 OTUD6A.

64 The relevant raw data are provided in Supplemental Materials.

65



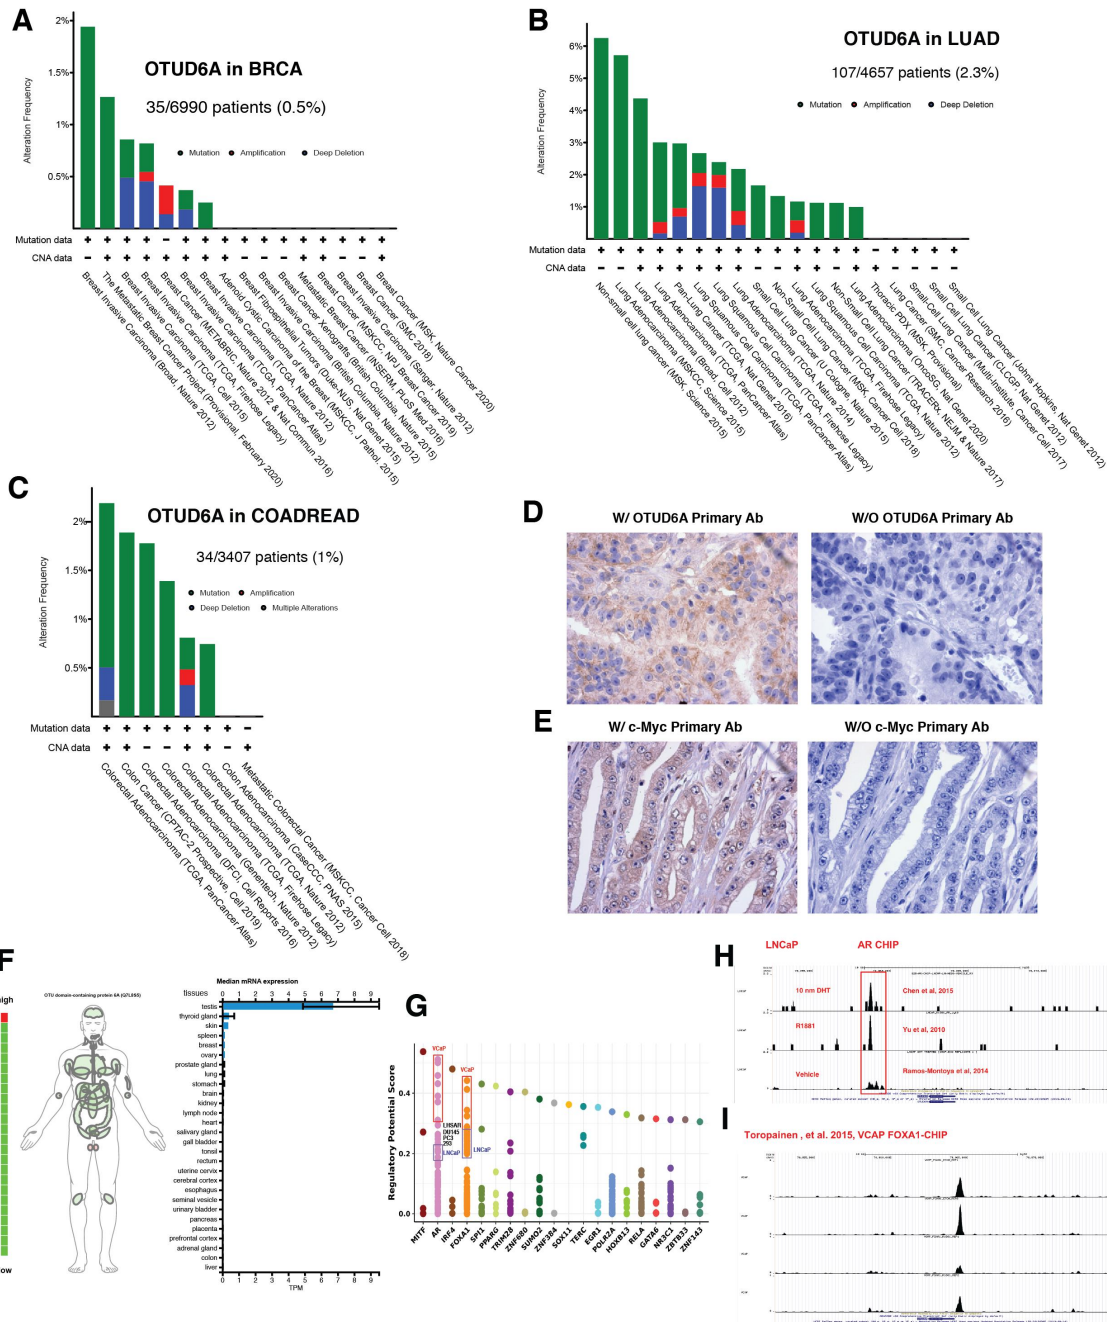

66  
 67 **Supplementary figure 5. *OTUD6A* is a prostatic specific oncogene in PrCa. (A-C)**  
 68 *OTUD6A* is not amplified but mutated at very low frequency in breast cancer (BRCA),  
 69 lung cancer (LUAD) and colorectal cancer (COADREAD). (D, E) Validation of IHC  
 70 staining for *OTUD6A* (D) and c-Myc antibody (E), in which staining without primary

71 antibody as negative control. **(F)** The expression patten of OTUD6A in different  
72 tissue/organ in human. **(G)** AR and FOXA1 are predicted transcription factor of *OTUD6A*  
73 based on the prediction of Cistrome. **(H)** AR binds with the promoter region of OTUD6A  
74 in LNCaP PrCa cells. **(I)** FOXA1 binds with the promoter/enhancer region of OTUD6A  
75 in VCaP PrCa cells.  
76

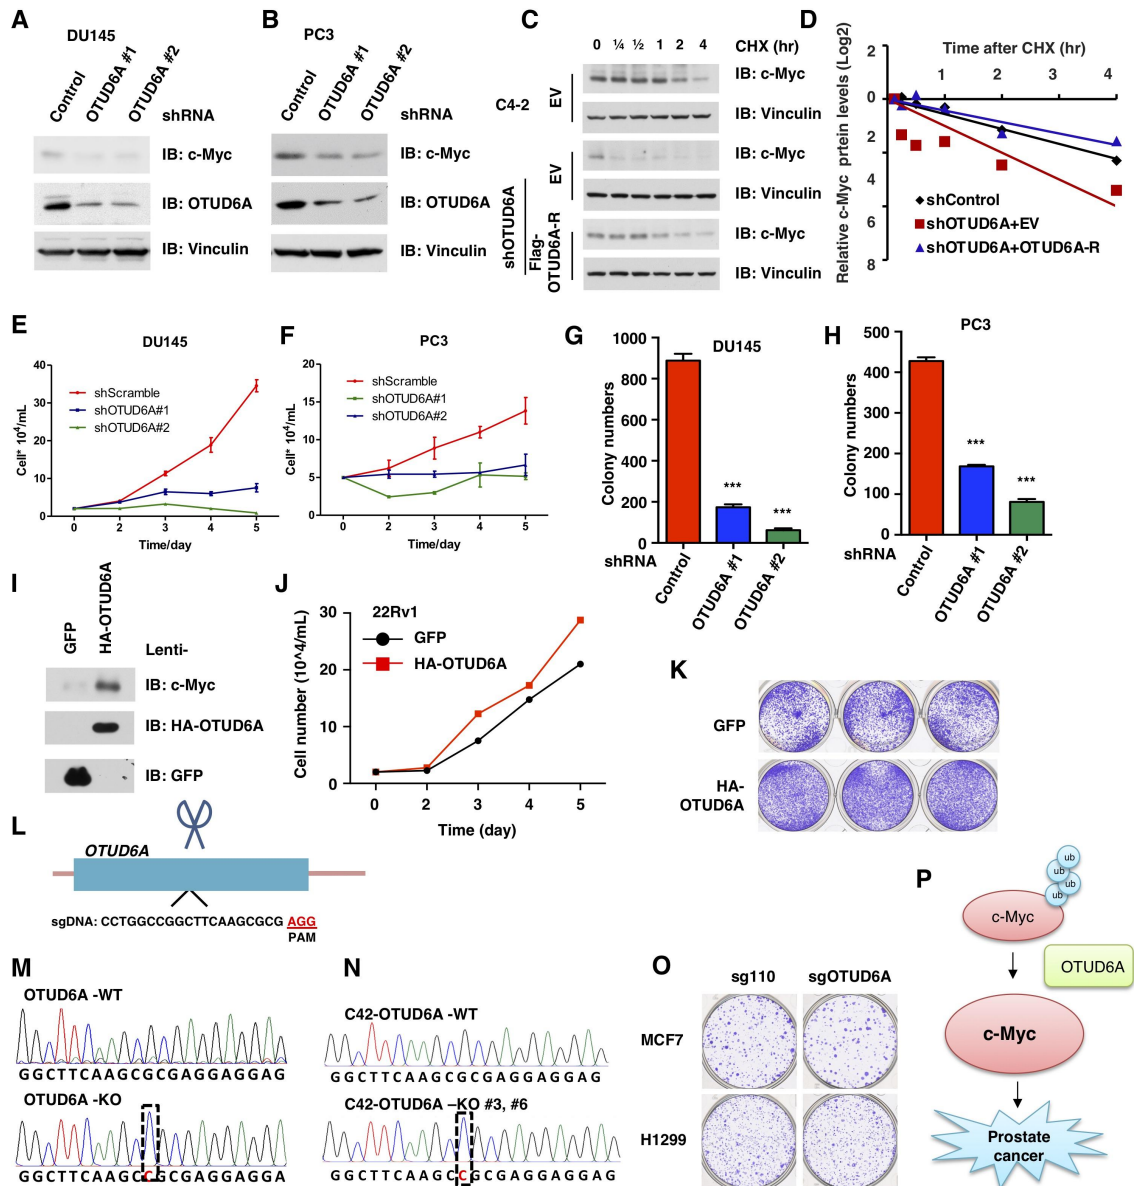

78

79 **Supplementary figure 6. Depletion of endogenous *OTUD6A* represses the**80 **proliferation and tumorigenesis of PrCa cells. (A, B) Depletion of *OTUD6A* leads to**81 **reduced protein levels of c-Myc in DU145 and PC3 PrCa cells. DU145 (A) and PC3 (B)**82 **cells were infected with shControl or shOTUD6A lenti-virus and selected with**83 **puromycin for 3 days, followed by IB assay for indicated proteins. (C, D) Depletion of**

84 *OTUD6A* reduces the half-life of c-Myc protein in C4-2 cells. C4-2 Cells were infected  
85 with shControl or shOTUD6A virus and selected with puromycin for 3 days, followed by  
86 transient transfection with EV or shRNA resistant Flag-OTUD6A constructs. The cells  
87 were treated with CHX (200 µg/ml) for indicated time before harvest, followed by IB  
88 assay for indicated proteins (C) and quantification (D). (E, F) Depletion of *OTUD6A*  
89 suppresses cell growth of DU145 (E) and PC3 cells (F). The cells as in **a** and **b** were  
90 subjected to growth curve analysis. (G, H) Depletion of *OTUD6A* suppresses colony  
91 growth of DU145 and PC3 PrCa cells. DU145 (G) and PC3 cells (H) as in **A** and **B** were  
92 subjected to colony formation assay. \*\*\*:  $P < 0.001$ . (I) Overexpression of OTUD6A  
93 leads to increased protein level of protein levels of c-Myc in 22Rv1 cells. (J)  
94 Overexpression of OTUD6A leads to increased cell proliferation of 22Rv1 cells. (K)  
95 Overexpression of OTUD6A leads to an increase in the tumorigenesis of 22Rv1 cells in  
96 the colony formation assay. (L) The sequence of sgDNA for CRISPR knockout of  
97 OTUD6A. (M, N) Sequencing validation of *OTUD6A* knockout in 22Rv1 (M) and C4-2  
98 cell (N). (O) Depletion of *OTUD6A* did not compromise the tumorigenesis of MCF7  
99 BRCA cells and H1299 LUAD cells. (P) A schematic diagram to show the effect of  
100 OTUD6A in promoting PrCa through deubiquitinating c-Myc oncoprotein.  
101 The relevant raw data are provided in Supplemental Materials.

102

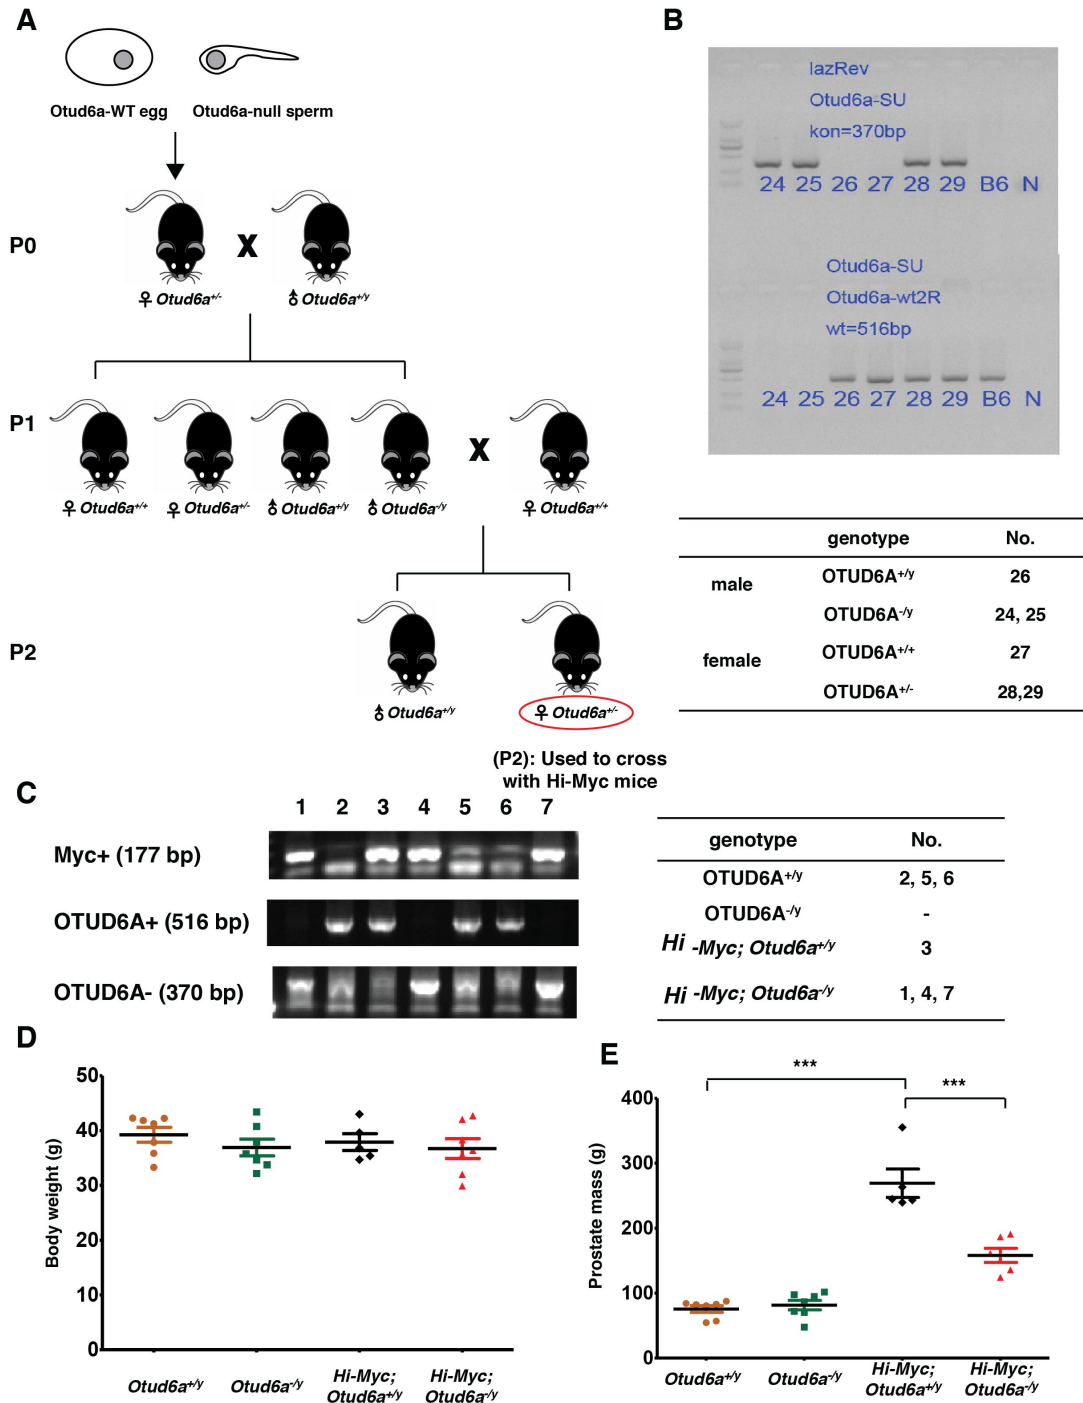

103

104 **Supplementary figure 7. Breeding of Hi-Myc mice with/without depletion of**

105 **endogenous *Otud6a*.** (A) A schematic diagram shows that the breeding strategy for

106 OTUD6A null mice. (B) Representative Genotyping results of OTUD6A WT and null

107 mice. (C) Representative Genotyping results of Hi-Myc mice with/without depletion of

108 endogenous *Otud6a*. **(D, E)** Body weight **(D)** and the weight of prostate tissue **(E)** of  
109 mice as in **Fig. 6B**. N=7, 7, 5 and 6 for *Otud6a*<sup>+y</sup>, *Otud6a*<sup>-y</sup>, *Hi-Myc;Otud6a*<sup>+y</sup> and  
110 *Hi-Myc;Otud6a*<sup>-y</sup> group, individually. \*  $P < 0.05$ , \*\*\*  $P < 0.001$ . One-way ANOVA.  
111

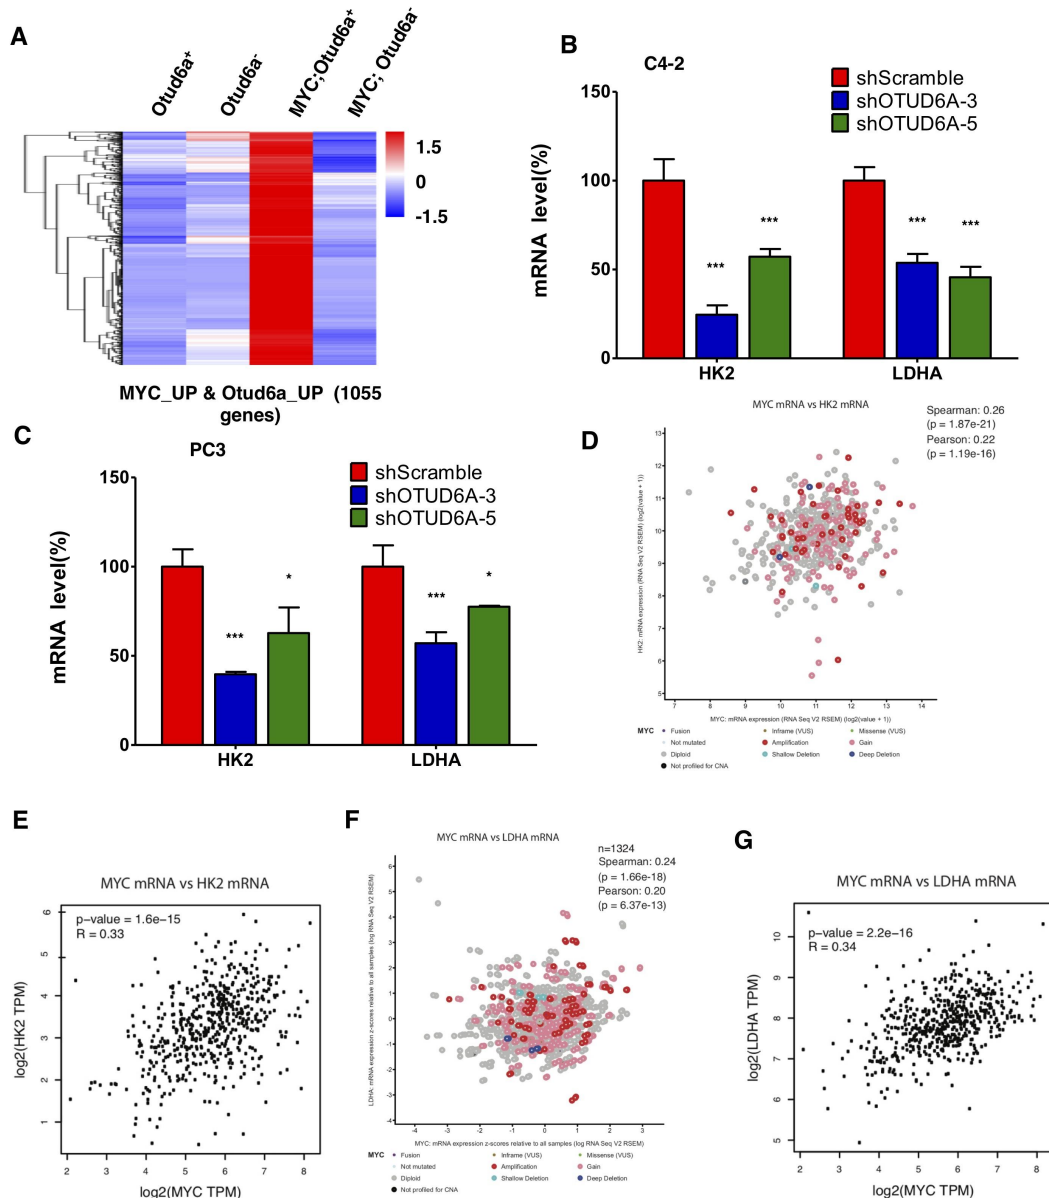

112

113 **Supplementary figure 8. The OTUD6A/c-Myc axis regulates the prostate cancer cell**

114 **metabolism. (A)** Heatmap shows the genes (DEG) in prostate tissue/tumors that

115 increased in *Myc*-driven mice and further decreased in *Otud6a* knockout mice. **(B, C)**

116 Depletion of *OTUD6A* led to reduced mRNA expressions of *HK2* and *LDHA* in C4-2 **(B)**

117 and PC3 PrCa cells **(C)**. These PrCa cells were depleted of *OTUD6A* by shRNA, and the

118 mRNA levels were measured by qPCR. **(D-G)** c-Myc expression level is positively

119 correlated with the mRNA levels of LDHA (**D, E**) and HK2 (**F, G**) in TCGA database.

120

121



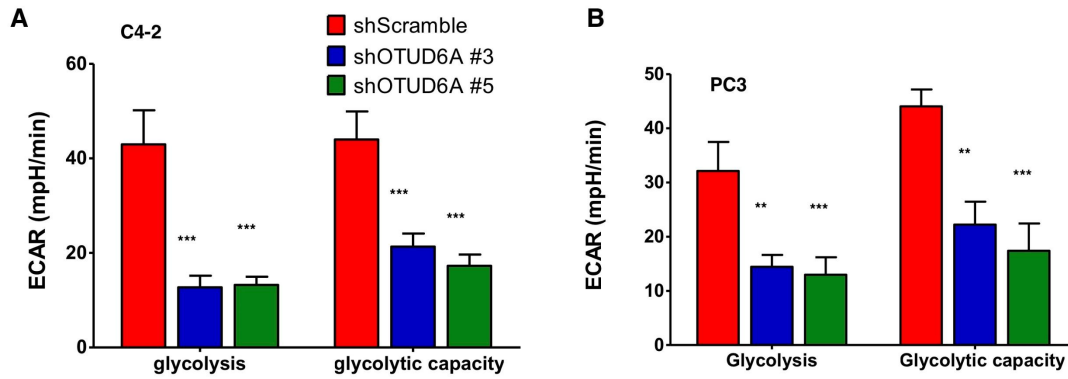

122

123 **Supplementary figure 9. Depletion of OTUD6A leads to the reduce in glycolytic**

124 **metabolism in PrCa cells. (A, B) Depletion of OTUD6A reduced the glycolysis level in**

125 **C4-2 (A) and PC3 cells (B). These PrCa cells were depleted of OTUD6A by shRNA, and**

126 **the cancer cell metabolism were measured by XF24 Seahorse extracellular flux analyzer.**
