# Supplementary material
Source: PubMed Central journal article supplement (PMC9433443)

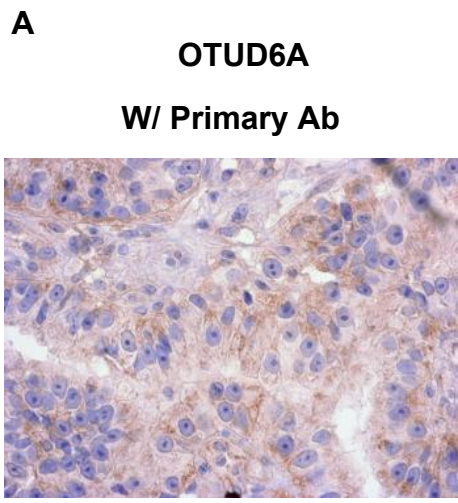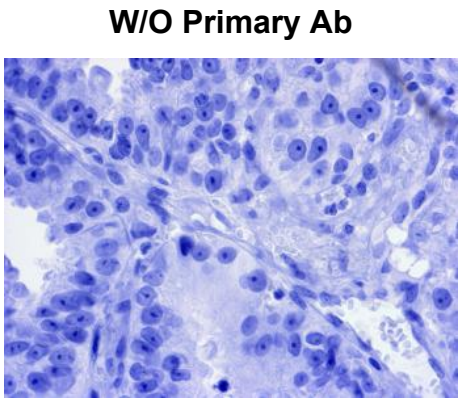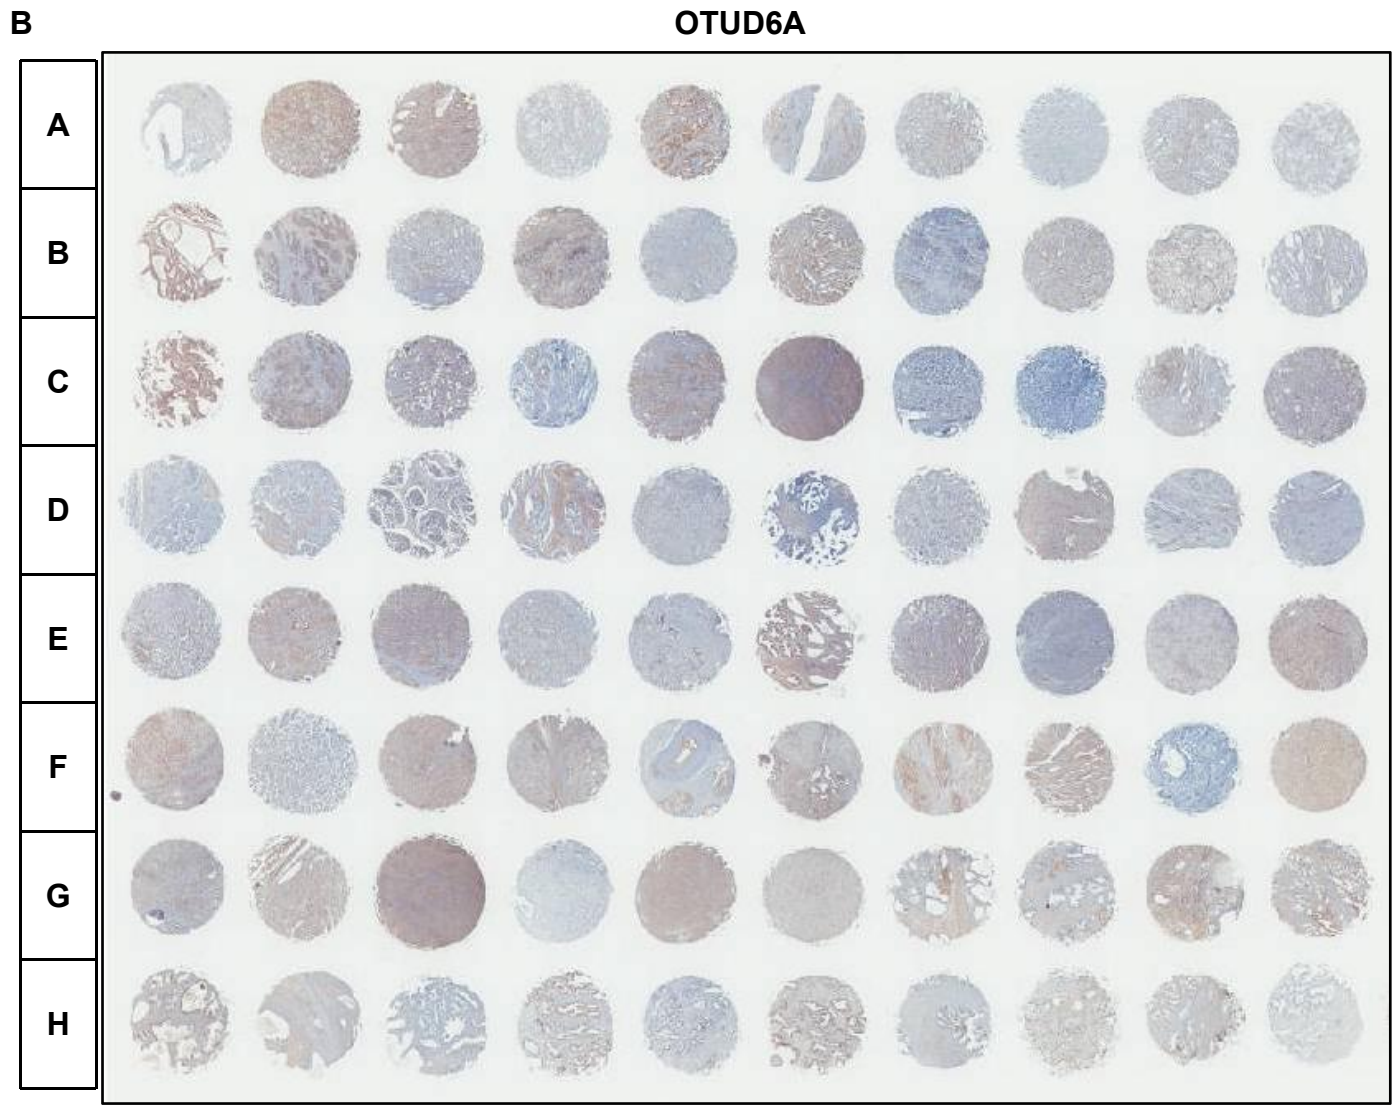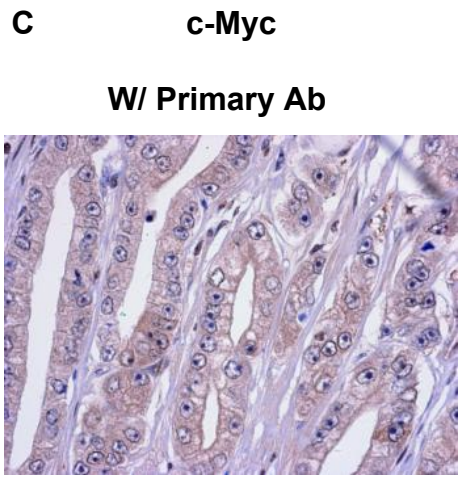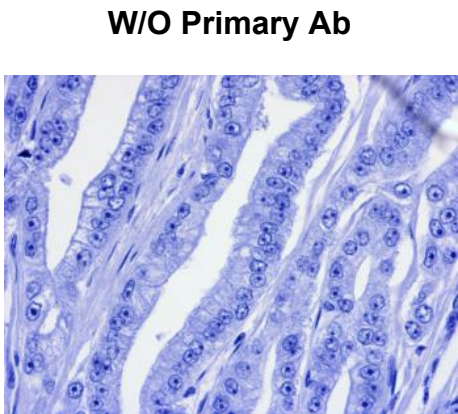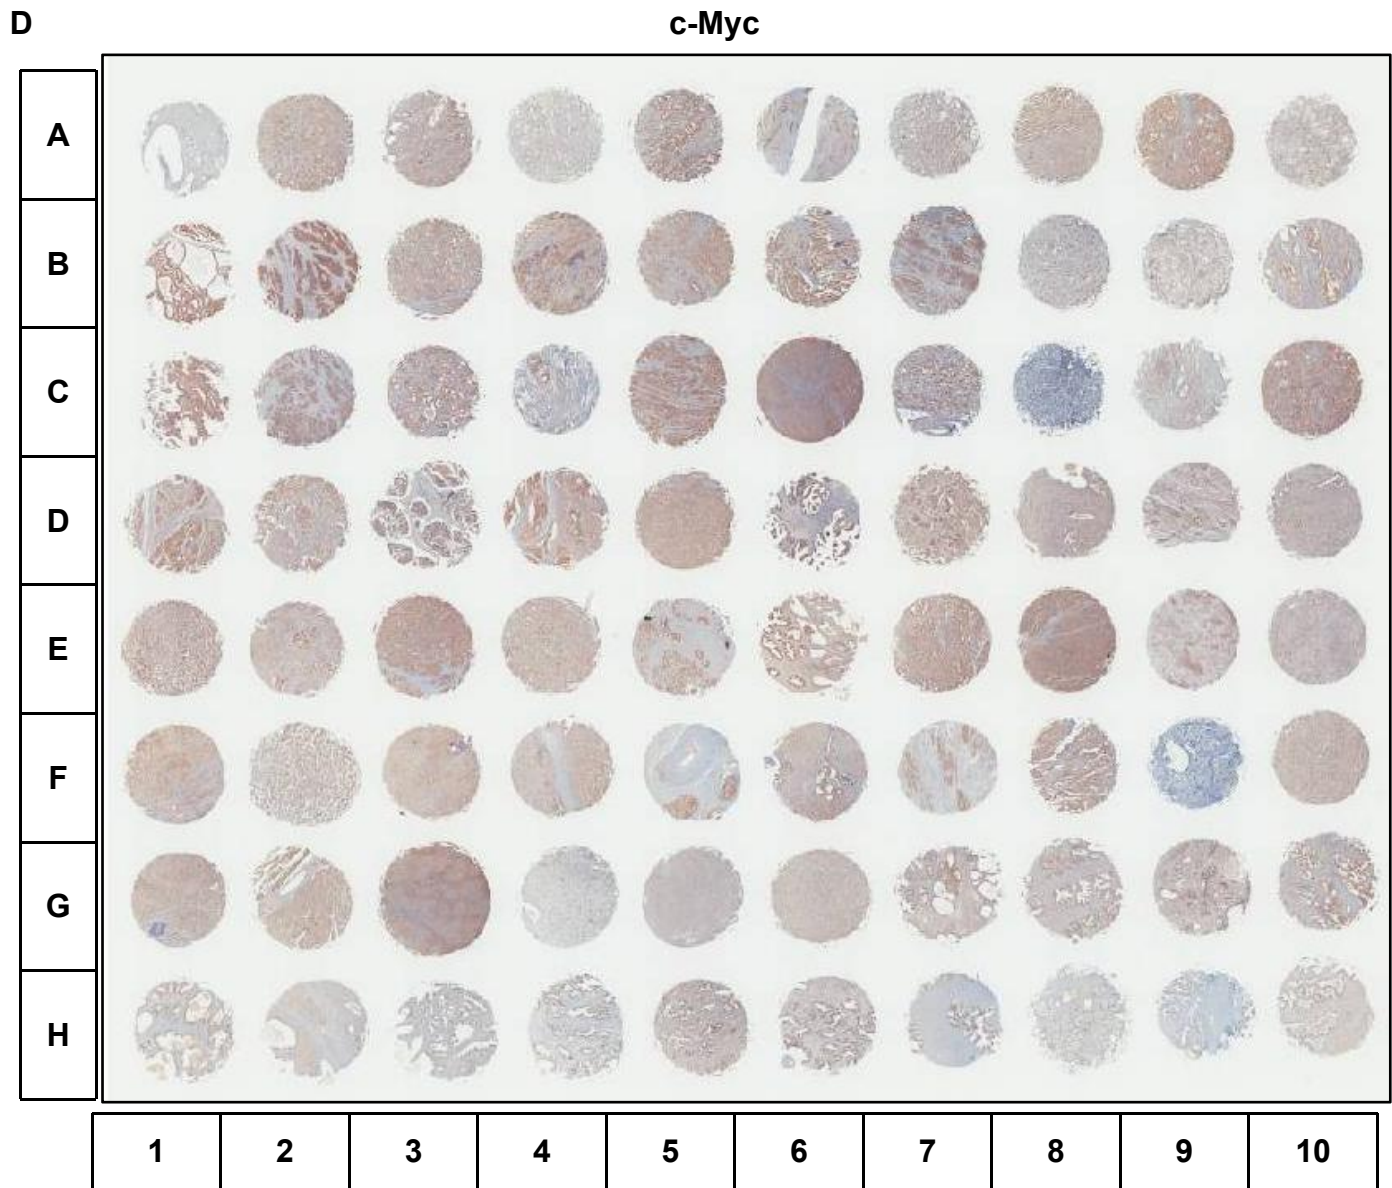

Supplement: 41418_2022_960_MOESM9_ESM.pdf [file 41418_2022_960_MOESM9_ESM.pdf]
